# Supplementary material for: Photoinduced crystal melting with luminescence evolution based on conformational isomerisation
Source: Royal Society of Chemistry journal article supplement (doi:10.1039/d3sc00838j), 2023-01-01
Supplement: d3sc00838j1.pdf [file d3sc00838j1.pdf]

SO-planar (opt.@Ti)

E(UB3LYP) = -7445.03528619 Hartree

|    |                 |                 |                 |
|----|-----------------|-----------------|-----------------|
| C  | -4.212067646297 | -0.192067058886 | -0.980822384758 |
| C  | -4.152147714944 | -0.433474920034 | -2.329754706701 |
| H  | -4.988032164546 | -0.557388852418 | -3.000741434041 |
| C  | -2.777410552651 | -0.492108223522 | -2.682276663530 |
| C  | -2.053976113263 | -0.279940314155 | -1.524710870898 |
| C  | -0.628817395586 | -0.221066040869 | -1.286381361682 |
| O  | 0.193234389567  | -0.403918229309 | -2.194243902113 |
| Br | -2.106992508275 | -0.800260798683 | -4.411700696400 |
| Si | -5.582977370549 | 0.052896399221  | 0.295899037537  |
| C  | -5.117379485117 | -1.040536207850 | 1.782529847725  |
| H  | -4.187086010414 | -0.583773171647 | 2.146336933414  |
| C  | -4.783480947171 | -2.499290874432 | 1.425730067893  |
| H  | -4.400612795709 | -3.029863965434 | 2.304601383756  |
| H  | -4.018703628389 | -2.564782844894 | 0.647705210911  |
| H  | -5.661121870761 | -3.048354585391 | 1.075538115365  |
| C  | -6.153245031855 | -0.967999505722 | 2.918295128333  |
| H  | -7.097181503733 | -1.442135437996 | 2.631530409625  |
| H  | -6.378054056972 | 0.060857107421  | 3.215534124398  |
| H  | -5.790807132679 | -1.491662845304 | 3.809707534790  |
| C  | -5.559810923281 | 1.889627427436  | 0.805422265986  |
| H  | -6.415603624997 | 2.031688097661  | 1.480312045740  |
| C  | -4.283053867827 | 2.272203245825  | 1.577139810084  |
| H  | -3.377998003439 | 2.069200570141  | 0.998410072085  |
| H  | -4.190854703201 | 1.726261589221  | 2.519529974523  |
| H  | -4.285693761336 | 3.340684210243  | 1.820222169795  |
| C  | -5.760065129277 | 2.811647881558  | -0.411014582150 |
| H  | -5.792236905183 | 3.862463237784  | -0.103082029870 |
| H  | -6.689868198969 | 2.602185254372  | -0.948295528608 |
| H  | -4.937575010954 | 2.708712837754  | -1.125865333754 |
| C  | -7.210323691172 | -0.355742563804 | -0.608191602032 |
| H  | -7.134894721603 | 0.196635449272  | -1.556468735182 |
| C  | -8.457274229663 | 0.170740391488  | 0.126290345527  |
| H  | -9.361807652205 | -0.020385615375 | -0.461670904412 |

|    |                 |                 |                 |
|----|-----------------|-----------------|-----------------|
| H  | -8.410461138564 | 1.247212714812  | 0.309557258948  |
| H  | -8.594291855610 | -0.321573411533 | 1.093636590682  |
| C  | -7.375656592287 | -1.846455962254 | -0.954357298683 |
| H  | -7.553429826388 | -2.444417907500 | -0.056283745863 |
| H  | -6.497774382338 | -2.262453039318 | -1.455999096362 |
| H  | -8.236723403111 | -1.998108783437 | -1.614741353045 |
| C  | 3.811173859187  | 0.126916301257  | 0.255174903228  |
| C  | 3.310902615516  | 0.385168444829  | 1.513187278500  |
| H  | 3.925992729770  | 0.572418890803  | 2.383924561186  |
| C  | 1.901965545426  | 0.389590004967  | 1.565439998847  |
| C  | 1.283073372420  | 0.131283628074  | 0.345467025835  |
| C  | -0.135982510262 | 0.077460763619  | 0.108129969641  |
| O  | -0.962946401627 | 0.276747841864  | 1.038607926647  |
| Br | 0.980212997384  | 0.731287341069  | 3.192331349723  |
| Si | 5.623215465995  | -0.037618312458 | -0.257432588625 |
| C  | 6.634304129502  | 0.904606894934  | 1.058104676323  |
| H  | 6.317874849055  | 0.444786113286  | 2.005638660938  |
| C  | 6.319756179557  | 2.407744774257  | 1.153941765689  |
| H  | 6.790812263227  | 2.845028266541  | 2.041423584288  |
| H  | 5.247245285552  | 2.607650845093  | 1.216710096860  |
| H  | 6.704388196729  | 2.952127527792  | 0.288078840199  |
| C  | 8.151073316625  | 0.672117838465  | 0.931526705864  |
| H  | 8.550883133750  | 1.113748943346  | 0.014142559787  |
| H  | 8.413836890627  | -0.389108267363 | 0.927694826228  |
| H  | 8.684709195611  | 1.136473120078  | 1.768255403453  |
| C  | 6.088350593640  | -1.887885809046 | -0.191090111982 |
| H  | 7.152445991672  | -1.941393334469 | -0.460354328949 |
| C  | 5.929354710261  | -2.467689099760 | 1.225154289407  |
| H  | 4.891200389359  | -2.402381059100 | 1.566078588997  |
| H  | 6.552248356800  | -1.950480804621 | 1.960575895499  |
| H  | 6.212374455474  | -3.525869764338 | 1.248176636976  |
| C  | 5.303347898361  | -2.729878575555 | -1.211812200292 |
| H  | 5.616280773068  | -3.779163283053 | -1.172268141673 |
| H  | 5.451281400596  | -2.386841572453 | -2.239494463579 |
| H  | 4.228519513734  | -2.707042818592 | -1.008829557889 |
| C  | 5.755456271989  | 0.580673470129  | -2.055863797024 |

|   |                 |                 |                 |
|---|-----------------|-----------------|-----------------|
| H | 5.016107407584  | -0.031159891161 | -2.593745611243 |
| C | 7.126970519903  | 0.298433311665  | -2.695250244913 |
| H | 7.118622835664  | 0.558070023752  | -3.759537515567 |
| H | 7.417399744915  | -0.752989088288 | -2.619581342498 |
| H | 7.917976580025  | 0.892901124474  | -2.228555885011 |
| C | 5.351306148096  | 2.051816030953  | -2.255960985941 |
| H | 6.093867630661  | 2.732752923269  | -1.832354538784 |
| H | 4.387419529647  | 2.285537346670  | -1.797294031425 |
| H | 5.271900919570  | 2.287316544901  | -3.322896826282 |
| O | -2.926671720098 | -0.101214213970 | -0.498202948796 |
| S | 2.514006095786  | -0.117197676306 | -0.884566520672 |

SO relaxed skew (opt.@T<sub>1</sub>)

E(UB3LYP) = -7445.02425346 Hartree

|    |                |                |                 |
|----|----------------|----------------|-----------------|
| Br | 9.476622367537 | 6.177483621916 | 5.045950100711  |
| Br | 8.175830991881 | 7.327022503614 | 1.172212180107  |
| S  | 7.122942851726 | 7.971061475863 | 8.342768516834  |
| Si | 4.763698171478 | 3.780897735014 | 4.419608012588  |
| Si | 8.329401874434 | 6.254200980775 | 10.745465081388 |
| O  | 5.949892611967 | 6.323633469903 | 4.419699765657  |
| O  | 6.787875414053 | 9.905119864200 | 6.154430991415  |
| O  | 6.926526396268 | 9.395828305880 | 3.387608788153  |
| C  | 6.737815588432 | 7.197480050593 | 3.738830586856  |
| C  | 7.099772781286 | 8.794169905356 | 5.728141806754  |
| C  | 8.513003301459 | 6.727258765659 | 6.600625779793  |
| C  | 7.036768222021 | 6.629967749959 | 2.482379229719  |
| C  | 7.599872992716 | 7.759204469123 | 6.672397634020  |
| C  | 6.454300084215 | 5.350808419930 | 2.461681477145  |
| H  | 6.529209462061 | 4.629581875377 | 1.662923701010  |
| C  | 8.806713282687 | 6.115351474233 | 7.848162342242  |
| H  | 9.524850814804 | 5.310885457351 | 7.941617300014  |
| C  | 7.015119525959 | 8.489670942359 | 4.293274608683  |
| C  | 7.086154487814 | 4.881184716238 | 11.199568152370 |
| H  | 7.204442083016 | 4.703406382759 | 12.277046961305 |
| C  | 8.134687020899 | 6.676225524610 | 8.909768481423  |

|   |                 |                |                 |
|---|-----------------|----------------|-----------------|
| C | 4.944099424477  | 2.304082820994 | 3.227487802698  |
| H | 6.016419903459  | 2.279396823946 | 2.985588702898  |
| C | 5.792925847981  | 5.175140819566 | 3.658216085598  |
| C | 10.101322789922 | 5.574947680056 | 10.945281484945 |
| H | 10.120952993837 | 4.705112227698 | 10.272252365183 |
| C | 5.522862908324  | 3.374213622993 | 6.115043494302  |
| H | 4.970266498854  | 2.496290018545 | 6.478795041971  |
| C | 7.396696317970  | 3.560095687707 | 10.474550872194 |
| H | 7.426482863074  | 3.690727097279 | 9.389120052863  |
| H | 6.632431409739  | 2.804522270136 | 10.689143761772 |
| H | 8.359765677569  | 3.141677810237 | 10.779546446149 |
| C | 7.901805089461  | 7.831300719055 | 11.729557590677 |
| H | 6.930026895729  | 8.143223105429 | 11.318558062546 |
| C | 4.595739358544  | 0.956698197171 | 3.888775359799  |
| H | 5.194853206355  | 0.761730049755 | 4.781435355415  |
| H | 4.771883851640  | 0.129950779762 | 3.192090470206  |
| H | 3.542935541585  | 0.909432363110 | 4.182082267112  |
| C | 4.170742343427  | 2.465021915590 | 1.905664355805  |
| H | 3.091550492810  | 2.399638243744 | 2.068715167009  |
| H | 4.436564825997  | 1.668242438346 | 1.202568854085  |
| H | 4.365917063976  | 3.419425065406 | 1.409284423532  |
| C | 5.634373056547  | 5.332102983321 | 10.958086678609 |
| H | 5.367634148735  | 6.200993166067 | 11.566288796362 |
| H | 4.928305588398  | 4.532225173637 | 11.208245262467 |
| H | 5.461690999659  | 5.601829210509 | 9.913056988293  |
| C | 10.379488932723 | 5.052606943062 | 12.366814090034 |
| H | 10.407911953266 | 5.869041305367 | 13.094336766440 |
| H | 11.352411040654 | 4.550910681604 | 12.412734920721 |
| H | 9.627240144656  | 4.335248446987 | 12.706771485561 |
| C | 7.691954311886  | 7.574765931406 | 13.233376248056 |
| H | 6.939682008868  | 6.806049508046 | 13.428316014601 |
| H | 7.359885805546  | 8.489202243316 | 13.737064765349 |
| H | 8.618275235951  | 7.259860237207 | 13.722799559164 |
| C | 5.338056644002  | 4.502504632973 | 7.144780329927  |
| H | 5.856131857694  | 5.415826764495 | 6.844315429977  |
| H | 5.749153400897  | 4.200844986974 | 8.109823349896  |

|   |                 |                |                 |
|---|-----------------|----------------|-----------------|
| H | 4.286781745293  | 4.752423589274 | 7.308919544808  |
| C | 3.001817197155  | 4.476055560156 | 4.635840662697  |
| H | 3.118876996616  | 5.236102532478 | 5.419574974027  |
| C | 11.219267229281 | 6.527659995434 | 10.486773384949 |
| H | 11.041437211520 | 6.927855933818 | 9.486021215259  |
| H | 12.184074217723 | 6.008393397208 | 10.469201889650 |
| H | 11.326263941622 | 7.377398810090 | 11.164930899279 |
| C | 7.008308969391  | 2.985521301565 | 5.997519265585  |
| H | 7.172572369945  | 2.152449866107 | 5.307677546359  |
| H | 7.407856004968  | 2.684667436247 | 6.971901821786  |
| H | 7.612469018742  | 3.827030788676 | 5.648183016875  |
| C | 8.881502691259  | 8.998359344003 | 11.512327906571 |
| H | 9.841766415195  | 8.806255286471 | 11.998245798188 |
| H | 8.482428094808  | 9.921780850445 | 11.945683365152 |
| H | 9.076969835714  | 9.192689138835 | 10.455195513591 |
| C | 2.433473807091  | 5.193673169045 | 3.399320661985  |
| H | 3.098631759032  | 5.983533530689 | 3.040408444885  |
| H | 1.471898888733  | 5.661006157223 | 3.637787574592  |
| H | 2.258990080992  | 4.506206237914 | 2.568241804284  |
| C | 2.023106726082  | 3.410228961522 | 5.161492100106  |
| H | 1.832783297438  | 2.635498533534 | 4.412386508957  |
| H | 1.055651705028  | 3.860836055210 | 5.407932971079  |
| H | 2.389131035453  | 2.913747861854 | 6.065302928932  |

**SO'** TS (opt.@S<sub>0</sub>)

E(RB3LYP) = -6155.73967641 Hartree

|   |                 |                 |                 |
|---|-----------------|-----------------|-----------------|
| C | -3.979590284703 | 1.847995486711  | 0.608827751456  |
| C | -3.891115598593 | 0.528543176788  | 0.937371120008  |
| C | -2.765539543606 | -0.089619862632 | 0.320031159685  |
| C | -2.023179129616 | 0.750107940876  | -0.461966849688 |
| S | -2.694471990857 | 2.351642357260  | -0.438084384189 |
| C | -0.800360766921 | 0.391164549431  | -1.251710717476 |
| C | 0.542646553279  | 0.690241938342  | -0.554606065525 |
| O | -0.832954149041 | -0.018530018955 | -2.382817979116 |
| C | 1.553906810884  | -0.351087880028 | -0.545947012879 |

|    |                 |                 |                 |
|----|-----------------|-----------------|-----------------|
| O  | 0.708318655043  | 1.803115496421  | -0.092441778125 |
| C  | 2.857718365721  | -0.391827592538 | -0.100703288513 |
| C  | 3.334830799063  | -1.713559173202 | -0.312656861047 |
| C  | 2.289473663009  | -2.391821074239 | -0.867261672545 |
| O  | 1.214439176412  | -1.595797181610 | -1.015983612660 |
| Br | 3.851850909482  | 1.011338112799  | 0.648978191760  |
| Br | -2.329523392704 | -1.925775366954 | 0.585394135391  |
| H  | -4.724316758151 | 2.563595356732  | 0.925883439337  |
| H  | -4.583079431755 | 0.005950821080  | 1.583196012928  |
| H  | 4.317197068714  | -2.092701444241 | -0.080815847214 |
| H  | 2.167485044340  | -3.410848642041 | -1.198310741588 |

**SO'** TS (opt.@T<sub>1</sub>)

E(UB3LYP) = -6155.66692958 Hartree

|    |                 |                 |                 |
|----|-----------------|-----------------|-----------------|
| C  | -3.876113058093 | -2.017732495193 | 0.052225014229  |
| C  | -3.966592328446 | -0.799068064725 | -0.562076924541 |
| C  | -2.865165475950 | 0.035522516056  | -0.241136031839 |
| C  | -1.932002010041 | -0.561660306941 | 0.576403309853  |
| S  | -2.451372098677 | -2.169264864571 | 1.017333481320  |
| C  | -0.684666173963 | 0.030895579573  | 1.122586476354  |
| C  | 0.539358928456  | -0.284213721356 | 0.379479140436  |
| O  | -0.789550823794 | 0.736750771685  | 2.140737101576  |
| C  | 1.816377204698  | 0.245161103893  | 0.802998289471  |
| O  | 0.430729099681  | -1.017022666494 | -0.632428130838 |
| C  | 3.083032530131  | 0.113385152424  | 0.276438201445  |
| C  | 3.964717696261  | 0.859015073247  | 1.109922719795  |
| C  | 3.179515645422  | 1.392557146334  | 2.084860568598  |
| O  | 1.883452043894  | 1.033334873365  | 1.916265817451  |
| Br | 3.582528886570  | -0.858034579224 | -1.252780994329 |
| Br | -2.680932112378 | 1.795811823167  | -0.913537010465 |
| H  | -4.561113732213 | -2.849307145708 | -0.031530450588 |
| H  | -4.771072671615 | -0.504099685005 | -1.221361881734 |
| H  | 5.030001078769  | 0.972382199682  | 0.987276481715  |
| H  | 3.380249111289  | 2.023500599790  | 2.935316962091  |

OO-planar (opt.@T1)

E(UB3LYP) = -7122.04349584 Hartree

|    |                 |                 |                 |
|----|-----------------|-----------------|-----------------|
| C  | -3.741124199355 | -0.414843313181 | -0.832666826307 |
| C  | -3.491517601963 | -0.864871147732 | -2.104330891972 |
| H  | -4.224434013889 | -1.142148640369 | -2.846042164007 |
| C  | -2.081578450810 | -0.898865891439 | -2.263440985630 |
| C  | -1.528696925034 | -0.460360743065 | -1.073672857648 |
| C  | -0.148715480469 | -0.282782827813 | -0.688613089275 |
| O  | 0.775121959747  | -0.580406619367 | -1.468166820880 |
| Br | -1.163073067898 | -1.438923979386 | -3.813395486832 |
| Si | -5.279932982566 | -0.054758769855 | 0.201793264739  |
| C  | -5.040800153551 | -0.976117771910 | 1.850190806049  |
| H  | -4.174294477733 | -0.468495617988 | 2.295066355267  |
| C  | -4.660303741969 | -2.459770490558 | 1.707220245576  |
| H  | -4.408557866175 | -2.886216023045 | 2.684656591714  |
| H  | -3.791968798665 | -2.598603970585 | 1.057990108435  |
| H  | -5.478959764750 | -3.056546025932 | 1.297293951363  |
| C  | -6.233303264457 | -0.796502676973 | 2.806252435555  |
| H  | -7.125816513347 | -1.310913176500 | 2.435986416397  |
| H  | -6.496463912398 | 0.255290547831  | 2.954331371632  |
| H  | -6.008558227950 | -1.216889563672 | 3.792679703071  |
| C  | -5.328642513136 | 1.825597652786  | 0.509273365695  |
| H  | -6.284977239813 | 2.028680488659  | 1.011526112591  |
| C  | -4.197838536078 | 2.304668430081  | 1.439093640804  |
| H  | -3.208706723706 | 2.049016748867  | 1.050495885883  |
| H  | -4.273244086212 | 1.867489950967  | 2.438147983447  |
| H  | -4.234533657041 | 3.393380023643  | 1.558775774133  |
| C  | -5.316682932331 | 2.609566156736  | -0.815617901158 |
| H  | -5.400647196508 | 3.686395534211  | -0.632560356517 |
| H  | -6.140323764377 | 2.327420693624  | -1.478430179347 |
| H  | -4.383645947441 | 2.445984469530  | -1.363906740782 |
| C  | -6.758842894212 | -0.583120212638 | -0.879129231240 |
| H  | -6.537713633825 | -0.148282998091 | -1.864932997961 |
| C  | -8.096661007168 | 0.016261022065  | -0.407546451784 |
| H  | -8.906148964386 | -0.257488454690 | -1.093340252857 |

|    |                 |                 |                 |
|----|-----------------|-----------------|-----------------|
| H  | -8.069726587460 | 1.107633945325  | -0.356167970240 |
| H  | -8.377923744283 | -0.352654097285 | 0.583307515743  |
| C  | -6.885216464447 | -2.106231095068 | -1.063613359820 |
| H  | -7.203645187181 | -2.592118962105 | -0.137206393963 |
| H  | -5.945962101506 | -2.573727111853 | -1.371247639771 |
| H  | -7.637589506219 | -2.343983951633 | -1.823889405704 |
| C  | 3.741124199355  | 0.414843313181  | 0.832666826307  |
| C  | 3.491517601963  | 0.864871147732  | 2.104330891972  |
| H  | 4.224434013889  | 1.142148640369  | 2.846042164007  |
| C  | 2.081578450809  | 0.898865891439  | 2.263440985630  |
| C  | 1.528696925034  | 0.460360743065  | 1.073672857648  |
| C  | 0.148715480469  | 0.282782827813  | 0.688613089275  |
| O  | -0.775121959747 | 0.580406619367  | 1.468166820880  |
| Br | 1.163073067898  | 1.438923979386  | 3.813395486832  |
| Si | 5.279932982566  | 0.054758769855  | -0.201793264739 |
| C  | 6.758842894212  | 0.583120212638  | 0.879129231240  |
| H  | 6.537713633825  | 0.148282998091  | 1.864932997961  |
| C  | 6.885216464447  | 2.106231095068  | 1.063613359820  |
| H  | 7.637589506219  | 2.343983951633  | 1.823889405704  |
| H  | 5.945962101506  | 2.573727111853  | 1.371247639771  |
| H  | 7.203645187181  | 2.592118962105  | 0.137206393963  |
| C  | 8.096661007168  | -0.016261022065 | 0.407546451784  |
| H  | 8.377923744283  | 0.352654097285  | -0.583307515743 |
| H  | 8.069726587460  | -1.107633945325 | 0.356167970240  |
| H  | 8.906148964386  | 0.257488454690  | 1.093340252857  |
| C  | 5.328642513136  | -1.825597652786 | -0.509273365695 |
| H  | 6.284977239813  | -2.028680488659 | -1.011526112591 |
| C  | 5.316682932331  | -2.609566156736 | 0.815617901158  |
| H  | 4.383645947441  | -2.445984469530 | 1.363906740782  |
| H  | 6.140323764377  | -2.327420693624 | 1.478430179347  |
| H  | 5.400647196508  | -3.686395534211 | 0.632560356517  |
| C  | 4.197838536078  | -2.304668430081 | -1.439093640804 |
| H  | 4.234533657041  | -3.393380023643 | -1.558775774133 |
| H  | 4.273244086212  | -1.867489950967 | -2.438147983447 |
| H  | 3.208706723706  | -2.049016748867 | -1.050495885883 |
| C  | 5.040800153551  | 0.976117771910  | -1.850190806049 |



|   |                 |                 |                 |
|---|-----------------|-----------------|-----------------|
| H | 4.174294477733  | 0.468495617988  | -2.295066355267 |
| C | 6.233303264457  | 0.796502676973  | -2.806252435555 |
| H | 6.008558227950  | 1.216889563672  | -3.792679703071 |
| H | 6.496463912398  | -0.255290547831 | -2.954331371632 |
| H | 7.125816513347  | 1.310913176500  | -2.435986416397 |
| C | 4.660303741969  | 2.459770490558  | -1.707220245576 |
| H | 5.478959764750  | 3.056546025932  | -1.297293951363 |
| H | 3.791968798665  | 2.598603970585  | -1.057990108435 |
| H | 4.408557866175  | 2.886216023045  | -2.684656591714 |
| O | -2.536604461279 | -0.172208278715 | -0.210745240689 |
| O | 2.536604461279  | 0.172208278715  | 0.210745240689  |

**OO-skew (opt.@T<sub>1</sub>)**

E(UB3LYP) = -7122.03659955 Hartree

|    |                 |                 |                 |
|----|-----------------|-----------------|-----------------|
| Br | 13.351439765710 | 7.263791725885  | 23.096690901303 |
| Br | 9.320322323820  | 9.788654240988  | 22.086633330628 |
| Si | 8.178397692418  | 12.381012373770 | 16.895367980191 |
| Si | 10.033503596360 | 6.089615612180  | 18.353734694446 |
| O  | 11.381262679839 | 8.177513102281  | 19.663818817018 |
| O  | 10.261506283061 | 11.505009844978 | 18.522150786654 |
| O  | 13.509579795348 | 10.140982109702 | 21.727974153705 |
| O  | 12.783146370198 | 11.830476769174 | 19.547053583522 |
| C  | 12.131927574601 | 8.522808126580  | 20.749856386171 |
| C  | 8.890249931867  | 11.503567465675 | 18.419127473205 |
| C  | 10.622602337324 | 10.920723871967 | 19.701294403575 |
| C  | 12.055861405563 | 10.951170978495 | 19.992930767446 |
| C  | 12.583846858811 | 9.873077232547  | 20.918964986173 |
| C  | 8.375542955496  | 10.923788639894 | 19.550128873281 |
| H  | 7.333652884440  | 10.783618130809 | 19.791859831420 |
| C  | 6.588588310504  | 11.487032546236 | 16.314990336331 |
| H  | 5.768642023911  | 11.946570173383 | 16.883692322766 |
| C  | 11.109249552882 | 6.824987377467  | 19.723122349356 |
| C  | 9.476572525660  | 10.557733971075 | 20.371921505040 |
| C  | 12.380411563246 | 7.377777067218  | 21.492256730834 |
| C  | 11.714764936113 | 6.309331417612  | 20.842460515110 |

|   |                 |                 |                 |
|---|-----------------|-----------------|-----------------|
| H | 11.692824450805 | 5.280786321301  | 21.168415105895 |
| C | 7.783580050621  | 14.164111702832 | 17.445660931951 |
| H | 8.742567851985  | 14.562183903704 | 17.803904482495 |
| C | 9.529686635686  | 12.376998407451 | 15.555217876701 |
| H | 9.037064191415  | 12.762276084768 | 14.651533613768 |
| C | 6.792046367200  | 14.222020719554 | 18.619795805161 |
| H | 5.804130454703  | 13.844735130844 | 18.334610047899 |
| H | 6.651607780096  | 15.253833683994 | 18.960092612827 |
| H | 7.136575651324  | 13.639648670570 | 19.478585272932 |
| C | 6.555743729279  | 9.976041288575  | 16.601517147277 |
| H | 7.384539631680  | 9.449299674158  | 16.121123947482 |
| H | 5.628184390762  | 9.530605923282  | 16.224096549586 |
| H | 6.611512264553  | 9.757438455923  | 17.668444192607 |
| C | 10.709647148902 | 13.314293986457 | 15.878447235817 |
| H | 10.388329279796 | 14.348569849201 | 16.028991570705 |
| H | 11.430366679947 | 13.317254519006 | 15.053067727498 |
| H | 11.243162969369 | 12.996024455008 | 16.776411233442 |
| C | 8.252252089347  | 5.929035887162  | 19.015438080478 |
| H | 7.660274194937  | 5.509659381120  | 18.189943856299 |
| C | 10.035953063796 | 10.956794931603 | 15.243753454502 |
| H | 10.524840067504 | 10.515143742734 | 16.114779382890 |
| H | 10.771728726702 | 10.975528786412 | 14.432147680166 |
| H | 9.231932024473  | 10.282892858418 | 14.935692648602 |
| C | 7.307273405693  | 15.054459303521 | 16.283986923518 |
| H | 7.998822027403  | 15.045039392042 | 15.436558266453 |
| H | 7.205175382774  | 16.095646752014 | 16.609136803561 |
| H | 6.326048277191  | 14.739963849200 | 15.914794327394 |
| C | 6.313050918400  | 11.750633552172 | 14.820529255551 |
| H | 6.300529536786  | 12.814668646608 | 14.571340557775 |
| H | 5.341295344290  | 11.336890213813 | 14.529849307348 |
| H | 7.067141867397  | 11.275744435762 | 14.186082781447 |
| C | 7.656936887213  | 7.298843011618  | 19.379330055963 |
| H | 8.203565853919  | 7.761106261685  | 20.205089809674 |
| H | 6.612692747022  | 7.200026071248  | 19.697159049683 |
| H | 7.679081997382  | 7.997177324477  | 18.541033684431 |
| C | 10.735688936023 | 4.344774247430  | 18.039396431567 |

|   |                 |                |                 |
|---|-----------------|----------------|-----------------|
| H | 10.689588953915 | 3.871712783215 | 19.031822112859 |
| C | 8.152417994792  | 4.962348420863 | 20.207802721891 |
| H | 8.483676482679  | 3.950792851114 | 19.957025070286 |
| H | 7.118240242613  | 4.886091415072 | 20.561265211322 |
| H | 8.754785928287  | 5.311543776362 | 21.052903554804 |
| C | 9.857480238291  | 3.505127052934 | 17.094061892752 |
| H | 8.814542180545  | 3.459554051831 | 17.419359568970 |
| H | 10.225658609792 | 2.475019504807 | 17.034830364843 |
| H | 9.867596177204  | 3.906334290317 | 16.076314138189 |
| C | 9.078416260002  | 7.011782318698 | 15.803418712539 |
| H | 9.338307637514  | 6.082479462946 | 15.287740220270 |
| H | 9.071412090126  | 7.803253775788 | 15.046448437698 |
| H | 8.055324502641  | 6.908246684834 | 16.174835102889 |
| C | 12.207575706617 | 4.311871638208 | 17.593051578181 |
| H | 12.325487705858 | 4.678386868867 | 16.570413720725 |
| H | 12.592956817696 | 3.286370228896 | 17.611445020587 |
| H | 12.851118126240 | 4.917356981934 | 18.236495173386 |
| C | 10.083256502493 | 7.341943999980 | 16.921264560091 |
| H | 9.764389050730  | 8.284022704920 | 17.389245277736 |
| C | 11.488687848867 | 7.579447682951 | 16.341887913118 |
| H | 12.213672654074 | 7.843988913366 | 17.114925811371 |
| H | 11.471005406127 | 8.398783346950 | 15.616484470921 |
| H | 11.863878639351 | 6.697147041564 | 15.817470925059 |

SS-skew (opt.@Ti)

E(UB3LYP) = -7768.01406771 Hartree

|    |                 |                |                 |
|----|-----------------|----------------|-----------------|
| S  | 0.233408460970  | 3.228970747934 | 0.858547240815  |
| C  | -0.938798634847 | 4.315407003772 | 0.174094035530  |
| C  | -1.649856483395 | 3.675922104848 | -0.820249194579 |
| H  | -2.430120689721 | 4.149886014670 | -1.401444176601 |
| C  | -1.265570665199 | 2.329883249975 | -1.027517073217 |
| C  | -0.271571968569 | 1.898771177948 | -0.163958871693 |
| C  | 0.404977139734  | 0.609452178220 | -0.042906293155 |
| O  | 1.639979669014  | 0.564127634404 | 0.151651828580  |
| Br | -1.987303182450 | 1.315977504602 | -2.459181344400 |

|    |                 |                 |                 |
|----|-----------------|-----------------|-----------------|
| Si | -1.094905961987 | 6.118916531472  | 0.724484693302  |
| C  | -0.601063848500 | 6.185672616382  | 2.564396259962  |
| H  | 0.385044602819  | 5.698074442432  | 2.586687256582  |
| C  | -1.522881738067 | 5.382527226781  | 3.498816025542  |
| H  | -1.084574839171 | 5.305855694809  | 4.499839474939  |
| H  | -1.699332487302 | 4.365459333106  | 3.140034709915  |
| H  | -2.496088503001 | 5.866719564630  | 3.612402623387  |
| C  | -0.406290388566 | 7.619592940808  | 3.089751006135  |
| H  | -1.350968315432 | 8.170487229540  | 3.116152351546  |
| H  | 0.294860389967  | 8.197844379317  | 2.482100272354  |
| H  | -0.015903325586 | 7.606404261792  | 4.113234942775  |
| C  | 0.149230412773  | 7.141805693103  | -0.300084578621 |
| H  | 0.025822591564  | 8.182718122000  | 0.029950249538  |
| C  | 1.606965735258  | 6.731574579396  | -0.028161812560 |
| H  | 1.793700346871  | 5.695450729986  | -0.326137912790 |
| H  | 1.878912949804  | 6.825367877798  | 1.026872299502  |
| H  | 2.300038614871  | 7.359898813233  | -0.598302922986 |
| C  | -0.157800420741 | 7.083782470477  | -1.806432149094 |
| H  | 0.560352421877  | 7.685594137752  | -2.374097002779 |
| H  | -1.155823750941 | 7.462756403582  | -2.044017518442 |
| H  | -0.092569577741 | 6.059206236098  | -2.186197554386 |
| C  | -2.869276698979 | 6.658781580457  | 0.283507849334  |
| H  | -2.937349584638 | 6.465115218372  | -0.796886122839 |
| C  | -3.103161444189 | 8.167191639644  | 0.485394151097  |
| H  | -4.089678053539 | 8.459583733035  | 0.109308238469  |
| H  | -2.362292621116 | 8.780360587588  | -0.035003068428 |
| H  | -3.072181328032 | 8.440341821640  | 1.544194883732  |
| C  | -3.979386805818 | 5.837736618250  | 0.962972959214  |
| H  | -4.041072263833 | 6.054730237521  | 2.032057421809  |
| H  | -3.828523576719 | 4.760841259335  | 0.855250287921  |
| H  | -4.956612197309 | 6.079527087931  | 0.530563542005  |
| S  | -0.233408460970 | -3.228970747934 | 0.858547240815  |
| C  | 0.938798634847  | -4.315407003772 | 0.174094035530  |
| C  | 1.649856483395  | -3.675922104848 | -0.820249194579 |
| H  | 2.430120689721  | -4.149886014670 | -1.401444176601 |
| C  | 1.265570665199  | -2.329883249976 | -1.027517073217 |

|    |                 |                 |                 |
|----|-----------------|-----------------|-----------------|
| C  | 0.271571968569  | -1.898771177948 | -0.163958871693 |
| C  | -0.404977139734 | -0.609452178220 | -0.042906293155 |
| O  | -1.639979669014 | -0.564127634404 | 0.151651828580  |
| Br | 1.987303182450  | -1.315977504602 | -2.459181344400 |
| Si | 1.094905961987  | -6.118916531472 | 0.724484693302  |
| C  | 0.601063848500  | -6.185672616382 | 2.564396259962  |
| H  | -0.385044602819 | -5.698074442432 | 2.586687256582  |
| C  | 1.522881738067  | -5.382527226781 | 3.498816025542  |
| H  | 1.084574839171  | -5.305855694809 | 4.499839474939  |
| H  | 1.699332487302  | -4.365459333106 | 3.140034709915  |
| H  | 2.496088503001  | -5.866719564630 | 3.612402623387  |
| C  | 0.406290388566  | -7.619592940808 | 3.089751006135  |
| H  | 1.350968315432  | -8.170487229540 | 3.116152351546  |
| H  | -0.294860389967 | -8.197844379317 | 2.482100272354  |
| H  | 0.015903325586  | -7.606404261792 | 4.113234942775  |
| C  | -0.149230412773 | -7.141805693103 | -0.300084578621 |
| H  | -0.025822591564 | -8.182718122000 | 0.029950249538  |
| C  | -1.606965735258 | -6.731574579396 | -0.028161812560 |
| H  | -1.793700346871 | -5.695450729986 | -0.326137912790 |
| H  | -1.878912949804 | -6.825367877798 | 1.026872299502  |
| H  | -2.300038614871 | -7.359898813233 | -0.598302922986 |
| C  | 0.157800420741  | -7.083782470477 | -1.806432149094 |
| H  | -0.560352421877 | -7.685594137752 | -2.374097002779 |
| H  | 1.155823750941  | -7.462756403582 | -2.044017518442 |
| H  | 0.092569577741  | -6.059206236098 | -2.186197554386 |
| C  | 2.869276698979  | -6.658781580457 | 0.283507849334  |
| H  | 2.937349584638  | -6.465115218372 | -0.796886122839 |
| C  | 3.103161444189  | -8.167191639644 | 0.485394151097  |
| H  | 4.089678053539  | -8.459583733035 | 0.109308238469  |
| H  | 2.362292621116  | -8.780360587588 | -0.035003068428 |
| H  | 3.072181328032  | -8.440341821640 | 1.544194883732  |
| C  | 3.979386805818  | -5.837736618250 | 0.962972959214  |
| H  | 4.041072263833  | -6.054730237521 | 2.032057421809  |
| H  | 3.828523576719  | -4.760841259335 | 0.855250287921  |
| H  | 4.956612197309  | -6.079527087931 | 0.530563542005  |

SO-planar (1) (opt.@So)

E(B3LYP) = -7445.10860935 Hartree

|    |                 |                 |                 |
|----|-----------------|-----------------|-----------------|
| C  | 3.804961309869  | -0.787018542057 | 0.601389864492  |
| C  | 3.980387461210  | -2.134714523444 | 0.804568170279  |
| H  | 4.850264046999  | -2.719566659025 | 0.549118387202  |
| C  | 2.795659479623  | -2.615767616758 | 1.420622518495  |
| C  | 1.951705414065  | -1.537731836994 | 1.577386419881  |
| C  | 0.611691974725  | -1.381953684638 | 2.117530391902  |
| O  | -0.089485249961 | -2.317083224246 | 2.461109302714  |
| Br | 2.475948314545  | -4.396703804604 | 1.927780749468  |
| Si | 4.857851776600  | 0.628151572721  | -0.087032770462 |
| C  | 3.754405691651  | 1.558998125523  | -1.328879329124 |
| H  | 2.987604604972  | 2.021105789701  | -0.692930515477 |
| C  | 3.016745468284  | 0.656106740410  | -2.332927030056 |
| H  | 2.317212678128  | 1.245719184935  | -2.936045418177 |
| H  | 2.437849456440  | -0.124576508147 | -1.832728576807 |
| H  | 3.703865226965  | 0.164849406441  | -3.026330875378 |
| C  | 4.507416795927  | 2.692211048270  | -2.048789273539 |
| H  | 5.265118221771  | 2.298782927532  | -2.733576032174 |
| H  | 5.011458760675  | 3.368744430234  | -1.351894134697 |
| H  | 3.818631406185  | 3.297714226660  | -2.647988225232 |
| C  | 5.293979753741  | 1.751475321974  | 1.388360031257  |
| H  | 5.968238471493  | 2.524502443737  | 0.992805556747  |
| C  | 4.062365046362  | 2.457877016940  | 1.986968498980  |
| H  | 3.312672539446  | 1.749630295453  | 2.348768092365  |
| H  | 3.568764957822  | 3.112970717927  | 1.264096756247  |
| H  | 4.357208944304  | 3.082491168894  | 2.837529750447  |
| C  | 6.055425821169  | 0.972643457436  | 2.476934420691  |
| H  | 6.349244697592  | 1.637252624213  | 3.296430871268  |
| H  | 6.967017267626  | 0.500529368617  | 2.098453739021  |
| H  | 5.430857111443  | 0.184749875379  | 2.909360796801  |
| C  | 6.428445738172  | -0.190833161509 | -0.789221058920 |
| H  | 6.742272437140  | -0.889163434655 | 0.000433307972  |
| C  | 7.585235384587  | 0.803213766376  | -1.002342580588 |
| H  | 8.488830536404  | 0.279228531799  | -1.332928134218 |

|    |                 |                 |                 |
|----|-----------------|-----------------|-----------------|
| H  | 7.840872867925  | 1.347571012128  | -0.089789753655 |
| H  | 7.345589410266  | 1.544141385976  | -1.770574909309 |
| C  | 6.181646229580  | -1.016170426668 | -2.064888127890 |
| H  | 5.951381789942  | -0.370092822917 | -2.916691730147 |
| H  | 5.353817336047  | -1.722348577496 | -1.956369351629 |
| H  | 7.073992317045  | -1.592507020349 | -2.333182552722 |
| C  | -3.483471835421 | 0.381158311388  | 0.682152816040  |
| C  | -3.059455661009 | 1.642595942632  | 1.043467545811  |
| H  | -3.632097094019 | 2.545256516126  | 0.874981003423  |
| C  | -1.790616282637 | 1.656075344845  | 1.668293107481  |
| C  | -1.210784716604 | 0.404383578159  | 1.794640375764  |
| C  | 0.119730769628  | 0.070005121005  | 2.313008191326  |
| O  | 0.835206457207  | 0.849875490965  | 2.909516007120  |
| Br | -1.012760939737 | 3.298068896310  | 2.216949265762  |
| Si | -5.078541999264 | -0.082461828633 | -0.228460580703 |
| C  | -6.339472635584 | 1.291358436083  | 0.166987298636  |
| H  | -5.835957415883 | 2.209248741805  | -0.169657242920 |
| C  | -6.650425585931 | 1.467475414988  | 1.663702214711  |
| H  | -7.237774678233 | 2.377217444313  | 1.830502400597  |
| H  | -5.745806136991 | 1.543040143838  | 2.272064758779  |
| H  | -7.237924901191 | 0.632340482440  | 2.052333682356  |
| C  | -7.637855730692 | 1.164143573288  | -0.650661909325 |
| H  | -8.212754895766 | 0.281420544021  | -0.356022535322 |
| H  | -7.451596660851 | 1.092456421033  | -1.725827128497 |
| H  | -8.283905645434 | 2.034065713917  | -0.489462733534 |
| C  | -4.688049149964 | -0.061919946403 | -2.096825772033 |
| H  | -5.628258286403 | -0.320561280227 | -2.603381795545 |
| C  | -4.257596055811 | 1.332624358048  | -2.583486613815 |
| H  | -3.345366386143 | 1.666087468668  | -2.078373515561 |
| H  | -5.027216313197 | 2.090525181615  | -2.412355201519 |
| H  | -4.046932876683 | 1.322648127339  | -3.658558415055 |
| C  | -3.638920700725 | -1.118239661521 | -2.485329198653 |
| H  | -3.463599812873 | -1.112535053911 | -3.566755633434 |
| H  | -3.943759472672 | -2.132214299277 | -2.212222762426 |
| H  | -2.676737439132 | -0.922641445723 | -2.002365188033 |
| C  | -5.532611849424 | -1.855460875007 | 0.302141607599  |

|   |                 |                 |                 |
|---|-----------------|-----------------|-----------------|
| H | -4.611832853580 | -2.428046498172 | 0.115973774115  |
| C | -6.637309829245 | -2.484181821615 | -0.566750012752 |
| H | -6.786055529820 | -3.536111708120 | -0.299837203269 |
| H | -6.402988149415 | -2.449991773393 | -1.634078165261 |
| H | -7.597769237003 | -1.980360963977 | -0.424298521744 |
| C | -5.863044042873 | -2.006705058537 | 1.797521855384  |
| H | -6.824308537362 | -1.547630224195 | 2.042283925429  |
| H | -5.105493316076 | -1.554255750626 | 2.442181668641  |
| H | -5.934187344133 | -3.065016525661 | 2.070615017138  |
| O | 2.572139663201  | -0.429332068921 | 1.068648343846  |
| S | -2.298318389037 | -0.799182064671 | 1.127852023415  |

SO-skew (3) (opt.@S<sub>0</sub>)

E(B3LYP) = -7445.11383761 Hartree

|    |                |                |                 |
|----|----------------|----------------|-----------------|
| Br | 9.733020582529 | 5.852611410061 | 5.259673298106  |
| Br | 8.232927819445 | 6.980082703480 | 0.781607154257  |
| S  | 7.191702047070 | 7.835659650347 | 8.304638457103  |
| Si | 4.739025770390 | 3.729549358653 | 4.274103269779  |
| Si | 8.350128330933 | 6.373765013680 | 10.889971233461 |
| O  | 6.200985676713 | 6.094424449140 | 4.180839133218  |
| O  | 6.203971432826 | 9.000167098280 | 5.770018304220  |
| O  | 8.370338636211 | 8.835317124692 | 3.631884225211  |
| C  | 7.021817894879 | 6.899653643878 | 3.435564859578  |
| C  | 7.122536506362 | 8.224206434925 | 5.586038704884  |
| C  | 8.783502105665 | 6.567982388271 | 6.744451035381  |
| C  | 7.183947325923 | 6.328326475795 | 2.196960175566  |
| C  | 7.775848410224 | 7.512934265817 | 6.686960854560  |
| C  | 6.433589666983 | 5.121652174227 | 2.190555529952  |
| H  | 6.349980921584 | 4.426800535376 | 1.369399193685  |
| C  | 9.082423517135 | 6.125562423873 | 8.055980497336  |
| H  | 9.853270267780 | 5.393866946717 | 8.260303679737  |
| C  | 7.605609655229 | 8.036915845665 | 4.128026048649  |
| C  | 7.272451215912 | 4.829946295261 | 11.198759957986 |
| H  | 7.273706281231 | 4.671107626860 | 12.285878946638 |



|   |                 |                |                 |
|---|-----------------|----------------|-----------------|
| C | 8.305965505880  | 6.721434190416 | 9.026563853704  |
| C | 4.509934405354  | 2.328693526126 | 3.001482373392  |
| H | 5.518452968893  | 2.167896379984 | 2.593601320746  |
| C | 5.844361880653  | 5.008598796150 | 3.425699778435  |
| C | 10.165669122021 | 5.977585766347 | 11.313578140297 |
| H | 10.386253319322 | 5.088295358400 | 10.705369427112 |
| C | 5.691099478017  | 3.087977730750 | 5.795722713035  |
| H | 5.101879321072  | 2.244343143256 | 6.181686897584  |
| C | 7.855735083506  | 3.567956641775 | 10.540407614940 |
| H | 7.960112567291  | 3.691569293416 | 9.458195717759  |
| H | 7.201360582107  | 2.704583756689 | 10.704182685083 |
| H | 8.839535029838  | 3.308121310053 | 10.940609420953 |
| C | 7.572018749938  | 7.875622300440 | 11.768084985941 |
| H | 6.632413225354  | 8.047043864495 | 11.222205002348 |
| C | 4.059604230596  | 1.000058811744 | 3.636970483339  |
| H | 4.750265890343  | 0.652042800791 | 4.409164959964  |
| H | 3.996300838553  | 0.211949164621 | 2.878587753323  |
| H | 3.069424157359  | 1.084413426712 | 4.094491229380  |
| C | 3.588711981192  | 2.702438140318 | 1.825742239471  |
| H | 2.547533121813  | 2.785278762585 | 2.149588292426  |
| H | 3.621135261440  | 1.931728424092 | 1.047802266773  |
| H | 3.861235269635  | 3.652829033631 | 1.358955088651  |
| C | 5.815894383812  | 5.057284220661 | 10.756017442076 |
| H | 5.352640903987  | 5.906224276776 | 11.266595524583 |
| H | 5.201456635503  | 4.175633514719 | 10.969455920663 |
| H | 5.749199082995  | 5.244096017380 | 9.680837926109  |
| C | 10.352806314721 | 5.575626380307 | 12.788052824823 |
| H | 10.185417749283 | 6.424151197472 | 13.457887318236 |
| H | 11.374555424473 | 5.224079584516 | 12.968030994593 |
| H | 9.674280051663  | 4.774371882247 | 13.094907431742 |
| C | 7.193716232566  | 7.592757155505 | 13.233910633863 |
| H | 6.533354620489  | 6.727939409478 | 13.337380430947 |
| H | 6.673387866065  | 8.452670800147 | 13.669393837558 |
| H | 8.077253554117  | 7.407923010526 | 13.851751017245 |
| C | 5.808550153767  | 4.128154124768 | 6.923866525218  |
| H | 6.341964553301  | 5.024119943186 | 6.597453267140  |

|   |                 |                 |                 |
|---|-----------------|-----------------|-----------------|
| H | 6.363563381644  | 3.711418587577  | 7.769774328484  |
| H | 4.833518596531  | 4.443671458112  | 7.303743095161  |
| C | 3.161875060985  | 4.643230642539  | 4.824362947366  |
| H | 3.519590940504  | 5.323336126345  | 5.609247577797  |
| C | 11.176904057834 | 7.064025708421  | 10.907466361291 |
| H | 11.064092008123 | 7.366997227061  | 9.863701115304  |
| H | 12.202725245377 | 6.701661848888  | 11.037045141194 |
| H | 11.074599470295 | 7.961263444464  | 11.522087984044 |
| C | 7.082483481460  | 2.555501840436  | 5.406628364557  |
| H | 7.035883526720  | 1.782288779127  | 4.633898201162  |
| H | 7.588293087908  | 2.118006243324  | 6.274539397001  |
| H | 7.723151329251  | 3.359260874061  | 5.032103202818  |
| C | 8.402120067719  | 9.167380827588  | 11.661791615397 |
| H | 9.305142803353  | 9.110768522874  | 12.275456460698 |
| H | 7.825162265741  | 10.026654609004 | 12.020008445817 |
| H | 8.711118921361  | 9.386664522868  | 10.636725736407 |
| C | 2.517740758964  | 5.520617077871  | 3.736949066491  |
| H | 3.230979241143  | 6.227835158665  | 3.305870841846  |
| H | 1.692098363664  | 6.105582014833  | 4.156784534219  |
| H | 2.106567668833  | 4.924942101196  | 2.918339081671  |
| C | 2.129874795465  | 3.696075247647  | 5.462400671116  |
| H | 1.704358450419  | 3.010369015385  | 4.723122818531  |
| H | 1.295438820014  | 4.261482644734  | 5.891306544159  |
| H | 2.558454074749  | 3.089641471502  | 6.266398568707  |

**SO-(4) (opt.@So)**

E(B3LYP) = -7445.10794075 Hartree

|   |                 |                 |                |
|---|-----------------|-----------------|----------------|
| C | -3.510436725169 | -0.463266250380 | 0.060058361848 |
| C | -3.927126131716 | 0.665104258676  | 0.720894054164 |
| C | -1.809527317047 | 0.325555738225  | 1.310712534614 |
| C | -2.158742632552 | -0.680020269961 | 0.436261279616 |
| C | -0.572087316021 | 0.748203352321  | 1.951960404012 |
| O | -0.451714686624 | 1.796282198628  | 2.552715104458 |
| C | 0.615928805059  | -0.230325654416 | 1.960619804831 |
| O | 0.628291966653  | -1.069770333722 | 2.841808711923 |

|    |                 |                 |                 |
|----|-----------------|-----------------|-----------------|
| C  | 1.718049643571  | -0.060786181455 | 1.015883343245  |
| C  | 1.863742683350  | 0.690964019858  | -0.134019410207 |
| C  | 3.104427804344  | 0.502233316571  | -0.789667710879 |
| C  | 3.929204237714  | -0.400271187939 | -0.153113186290 |
| S  | 3.153671755942  | -1.026953621146 | 1.266041912402  |
| Br | 0.557327894199  | 1.859675556455  | -0.873956476396 |
| H  | -4.089724672955 | -1.068148983620 | -0.619891585252 |
| H  | 3.365601574460  | 1.024461364751  | -1.700821939712 |
| O  | -2.891590743711 | 1.140813445831  | 1.478697020042  |
| Br | -1.069192536768 | -2.069755650298 | -0.223580302659 |
| Si | -5.517950732927 | 1.689964330454  | 0.743063164950  |
| Si | 5.630944894306  | -1.001298623279 | -0.730206351938 |
| C  | -6.744819700898 | 0.758564806056  | -0.379780625688 |
| H  | -6.152019405217 | 0.498662690580  | -1.268904085305 |
| C  | -6.022910029527 | 1.892418429521  | 2.566501289431  |
| H  | -5.236097712858 | 2.536253380341  | 2.981732682117  |
| C  | -5.076668456474 | 3.379947659291  | -0.021021608345 |
| H  | -6.021858456973 | 3.935012126196  | -0.101830163608 |
| C  | -7.915582633184 | 1.638626003457  | -0.855949371097 |
| H  | -8.555510622549 | 1.085840127384  | -1.552559131418 |
| H  | -8.548832725652 | 1.955774825834  | -0.022326706683 |
| H  | -7.576709047035 | 2.540296565622  | -1.372348415211 |
| C  | -7.269034693433 | -0.555555999858 | 0.227222426323  |
| H  | -6.466600733764 | -1.200877056216 | 0.595026498091  |
| H  | -7.943765920967 | -0.363397254729 | 1.066105391273  |
| H  | -7.837327767192 | -1.126360836379 | -0.515512442051 |
| C  | -6.006283184807 | 0.586944946892  | 3.381047058216  |
| H  | -5.042613428263 | 0.075542071631  | 3.315162709773  |
| H  | -6.193496155546 | 0.794539092192  | 4.440363628159  |
| H  | -6.776515235488 | -0.113959197070 | 3.049699130451  |
| C  | -7.363859404911 | 2.631515364057  | 2.726213707213  |
| H  | -8.201335542328 | 2.024610163184  | 2.368307817820  |
| H  | -7.560242873673 | 2.856787755111  | 3.780055209905  |
| H  | -7.387631005515 | 3.580617307783  | 2.181832030767  |
| C  | -4.120093525613 | 4.203770305079  | 0.861499041573  |
| H  | -3.183083139144 | 3.673934291516  | 1.053442732331  |

|   |                 |                 |                 |
|---|-----------------|-----------------|-----------------|
| H | -3.867558671070 | 5.151597519952  | 0.373209188576  |
| H | -4.561056129494 | 4.448614085838  | 1.831296985729  |
| C | -4.501296223635 | 3.217064005062  | -1.440123549759 |
| H | -4.303745829959 | 4.193863008126  | -1.894822921336 |
| H | -3.552911815576 | 2.670623276753  | -1.422018997967 |
| H | -5.177761544280 | 2.677648296318  | -2.109701666655 |
| C | 6.599955998636  | -1.522026314798 | 0.825464335092  |
| H | 5.916214937586  | -2.213249147152 | 1.340336616025  |
| C | 6.367788512615  | 0.410076685269  | -1.778336697651 |
| H | 5.620403274647  | 0.561861235887  | -2.570657144585 |
| C | 5.342554169579  | -2.528372612772 | -1.838452473979 |
| H | 6.339360581303  | -2.852989295422 | -2.168053561463 |
| C | 4.698755464801  | -3.694531069927 | -1.068129767898 |
| H | 3.701308715164  | -3.430896598710 | -0.703571721840 |
| H | 4.584125336039  | -4.571136338527 | -1.715109140080 |
| H | 5.292646039177  | -4.005553571880 | -0.204275392254 |
| C | 4.518213395802  | -2.188169966230 | -3.092051122443 |
| H | 3.524416742182  | -1.814569806175 | -2.825068918188 |
| H | 5.000766469196  | -1.430999467173 | -3.716439156490 |
| H | 4.372721060421  | -3.076899728560 | -3.715872168308 |
| C | 7.684088774486  | 0.012918757322  | -2.471341494148 |
| H | 7.591861951531  | -0.909991631855 | -3.050649161761 |
| H | 8.011336451194  | 0.798807677617  | -3.160803849472 |
| H | 8.490919293392  | -0.131535230937 | -1.746985366797 |
| C | 6.522050017117  | 1.749941885381  | -1.037424996965 |
| H | 5.606485073840  | 2.049866009557  | -0.521806962142 |
| H | 7.319016820323  | 1.706833384806  | -0.291383289339 |
| H | 6.783318040370  | 2.549837804958  | -1.739082481532 |
| C | 7.882100538300  | -2.312169245820 | 0.505435631914  |
| H | 8.625417190429  | -1.687497186064 | 0.001645885504  |
| H | 8.346922855962  | -2.682278714466 | 1.425685589520  |
| H | 7.692882506335  | -3.178526639170 | -0.133923835486 |
| C | 6.898455398884  | -0.370649512388 | 1.801931803285  |
| H | 6.011859063273  | 0.225825228762  | 2.031130687361  |
| H | 7.284669796210  | -0.760166773649 | 2.749999710967  |
| H | 7.658063482121  | 0.305444337036  | 1.401169197752  |
